# Supplementary material for: Mapping the metabolism of five amino acids in bloodstream form Trypanosoma brucei using U-13C-labelled substrates and LC–MS
Source: PubMed Central journal article supplement (PMC6522824; doi:10.1042/bsr20181601), 2019-05-17

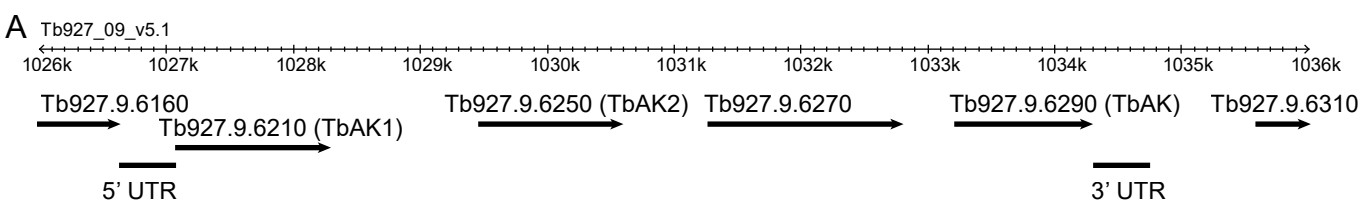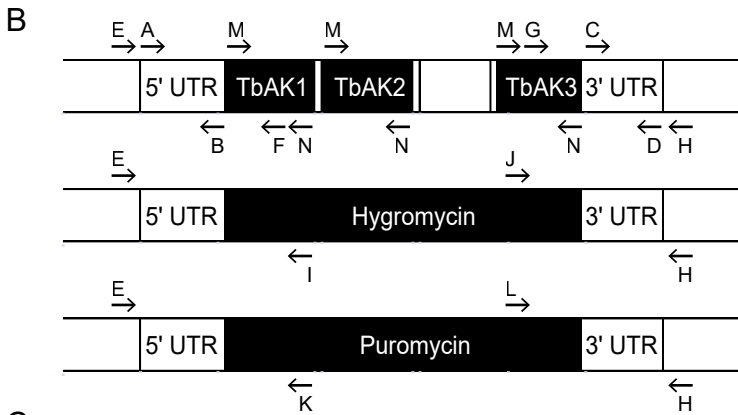

|           |           |    |         |
|-----------|-----------|----|---------|
| A. MB0655 | J. MB0415 | EF | 1329 bp |
| B. MB0656 | K. MB0419 | GH | 1350 bp |
| C. MB0657 | L. MB0422 | EI | 752 bp  |
| D. MB0658 | M. MB0666 | JH | 965 bp  |
| E. MB0664 | N. MB0667 | EK | 917 bp  |
| F. MB0662 |           | LH | 1055 bp |
| G. MB0661 |           | MN | 953 bp  |
| H. MB0665 |           |    |         |
| I. MB0416 |           |    |         |

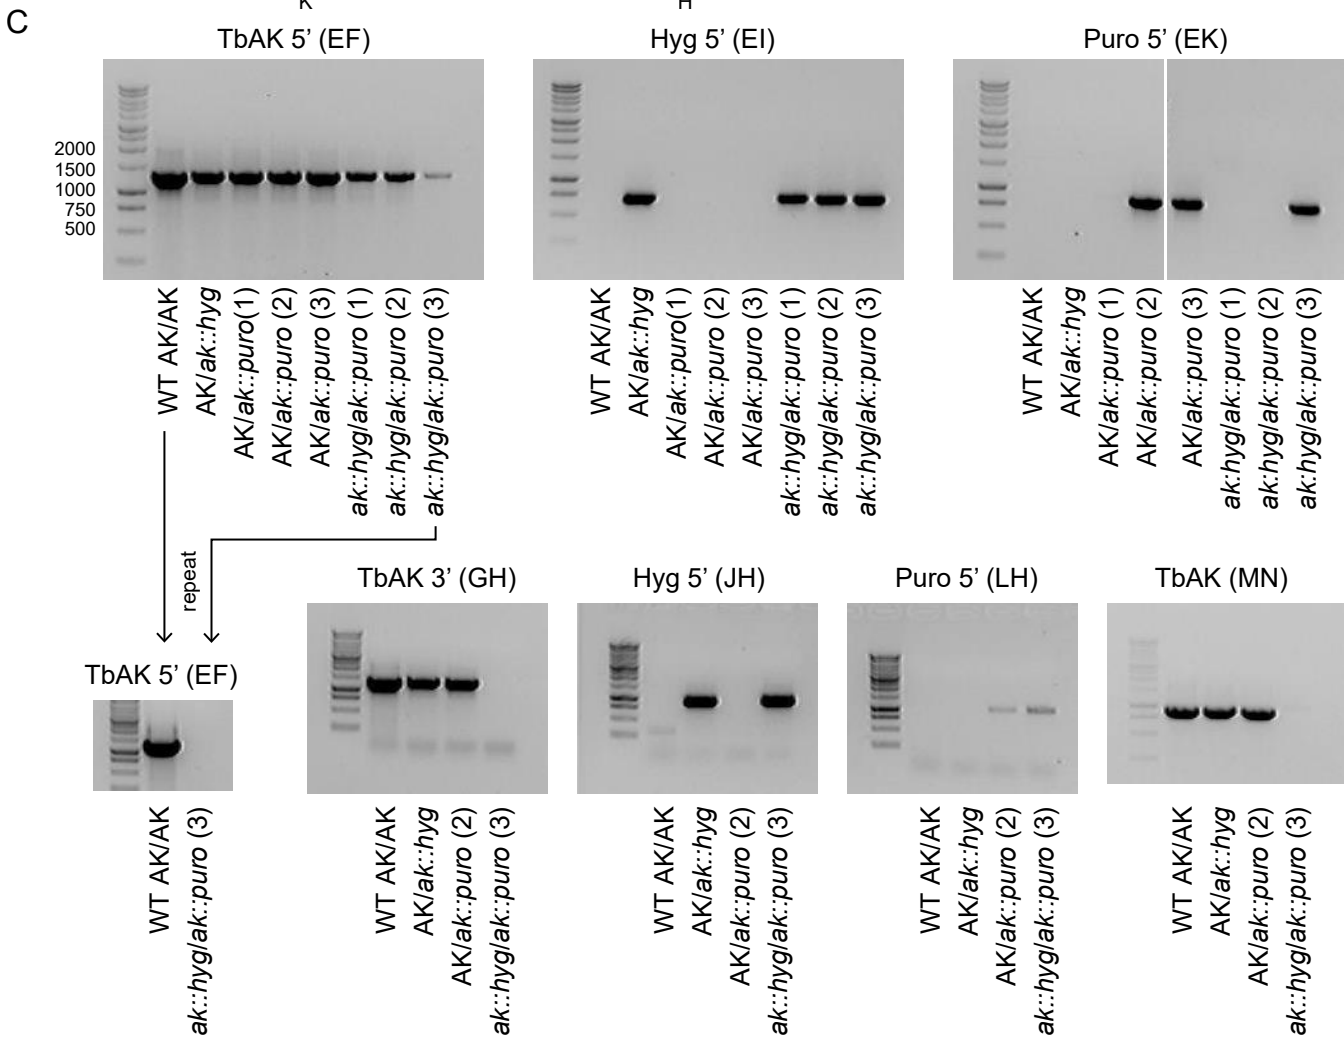

# LProline

Formula: C<sub>5</sub>H<sub>9</sub>NO<sub>2</sub> Mass: 115.063 Std.RT: 575.4 Ion: NEG

# G1

■UL ■+1 ■+2 ■+3 ■+4 ■+5

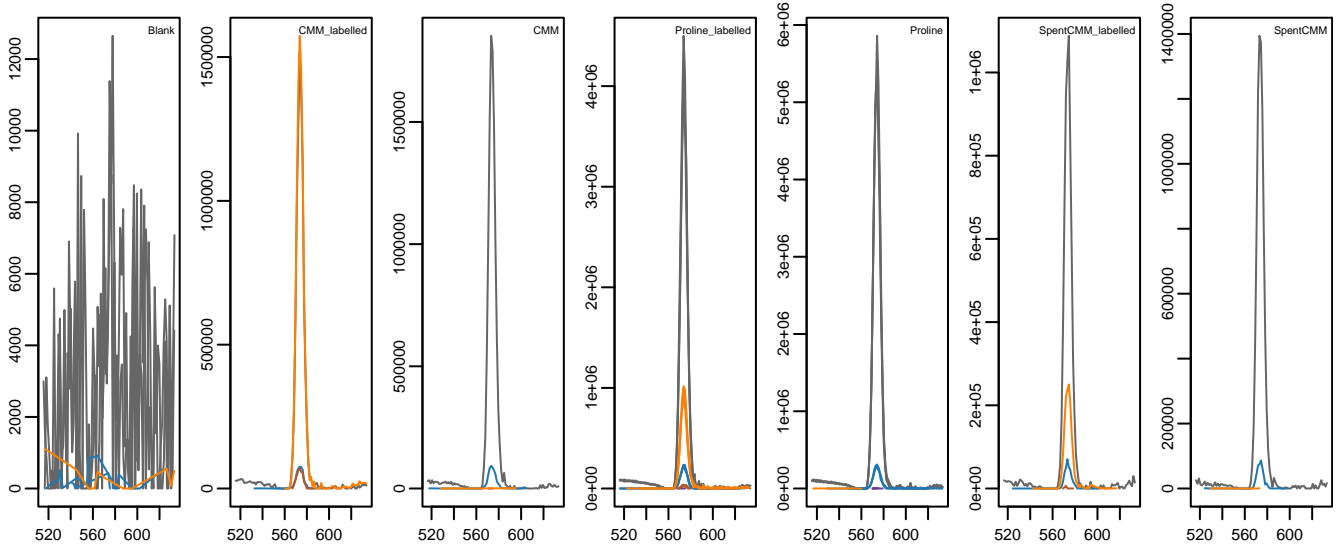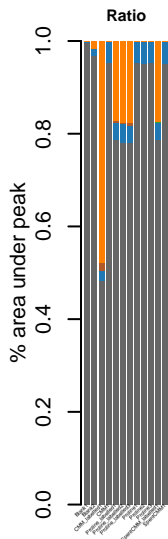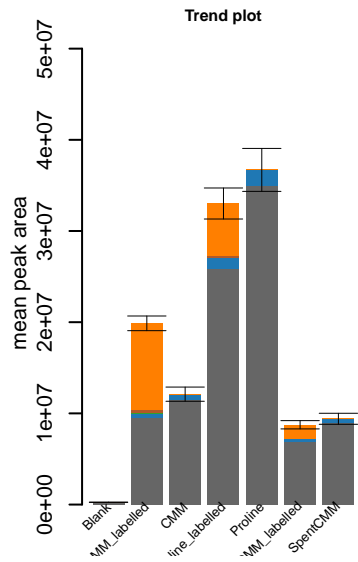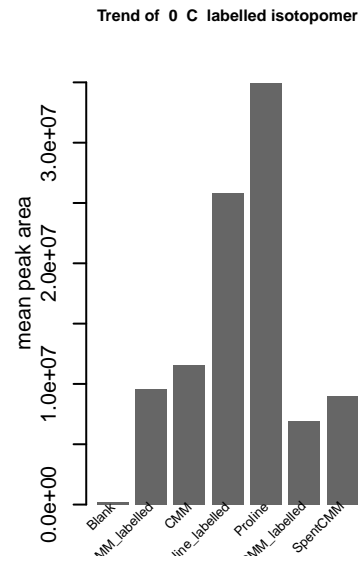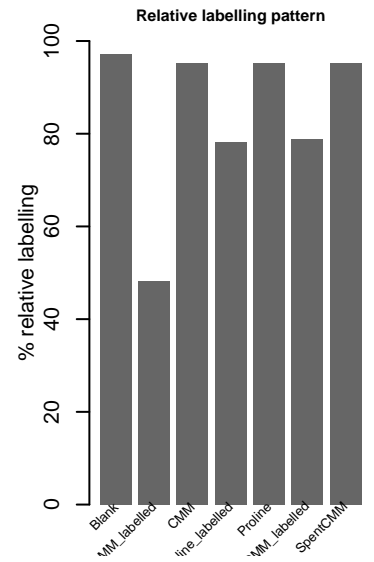

# glutathione

Formula: C<sub>10</sub>H<sub>17</sub>N<sub>3</sub>O<sub>6</sub>S Mass: 307.084 Std.RT: NA Ion: NEG

# G1

■UL ■+1 ■+2 ■+3 ■+4 ■+5 ■+6 ■+7 ■+8 ■+9 ■+10

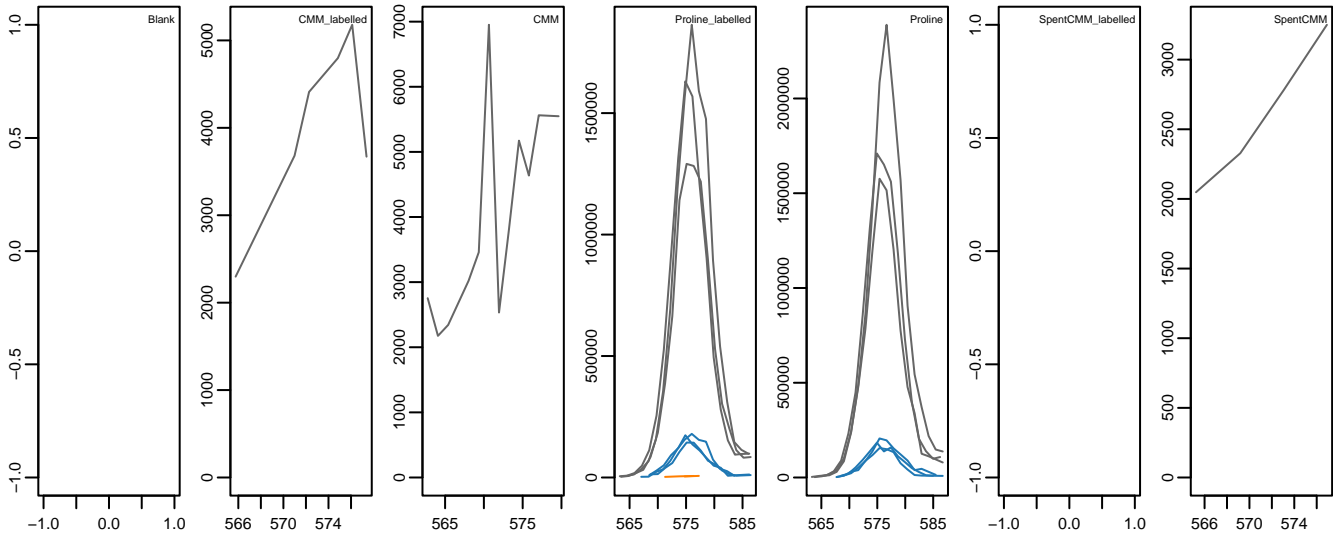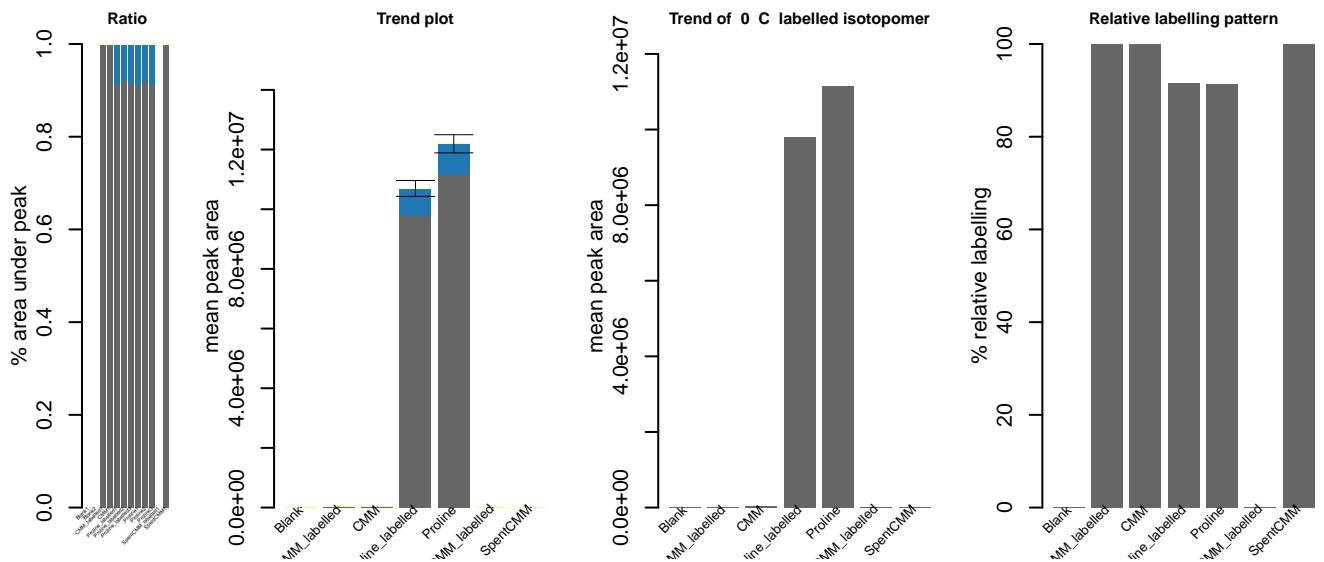

# (R)2Hydroxyglutarate

Formula: C<sub>5</sub>H<sub>8</sub>O<sub>5</sub> Mass: 148.037 Std.RT: 606 Ion: NEG

# G1

■UL ■+1 ■+2 ■+3 ■+4 ■+5

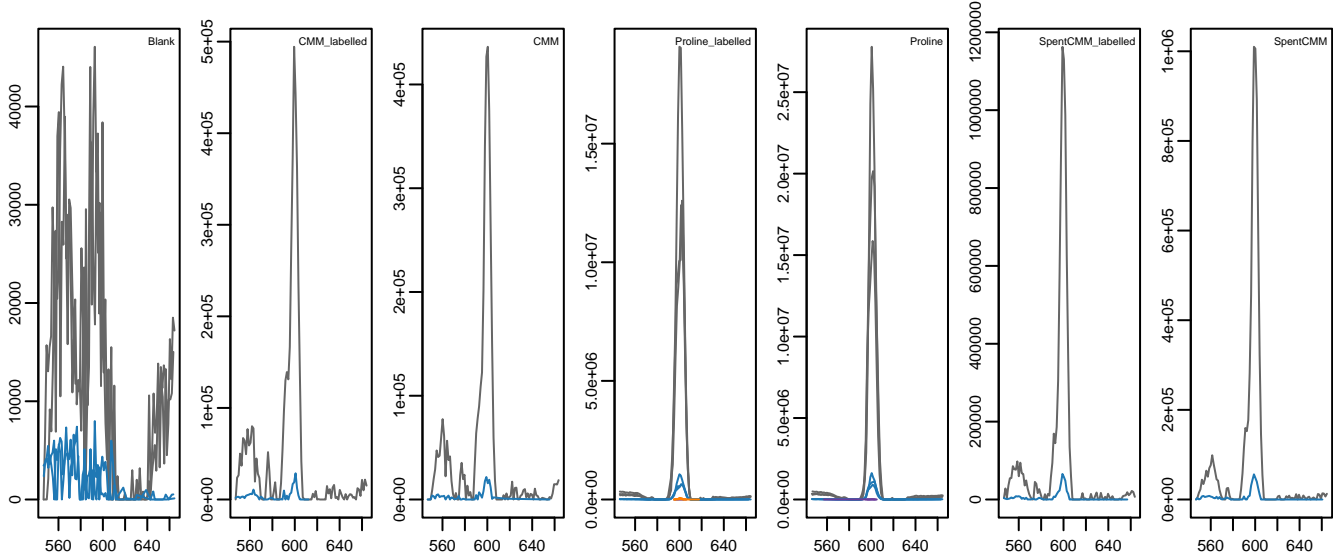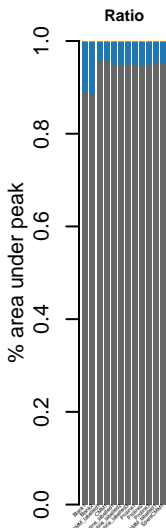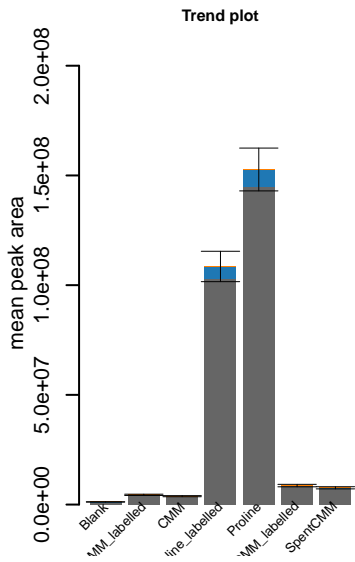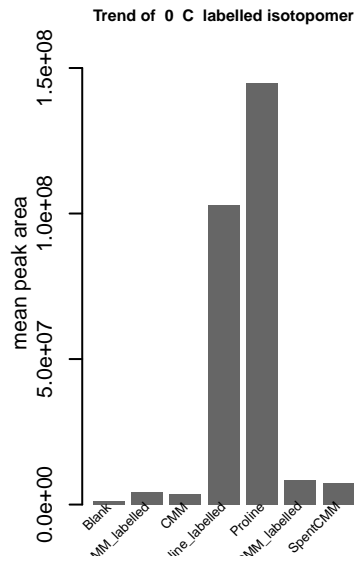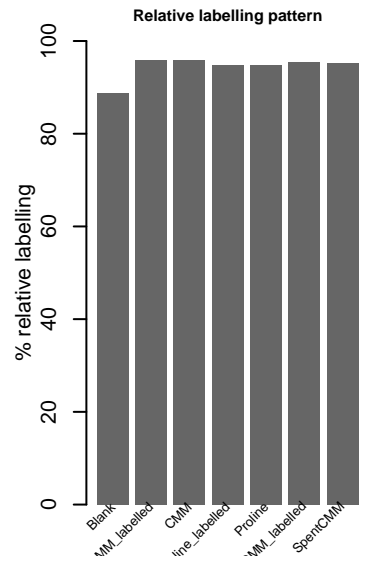

# Succinate

Formula: C<sub>4</sub>H<sub>6</sub>O<sub>4</sub> Mass: 118.027 Std.RT: 604.2 Ion: NEG

# G1

■UL ■+1 ■+2 ■+3 ■+4

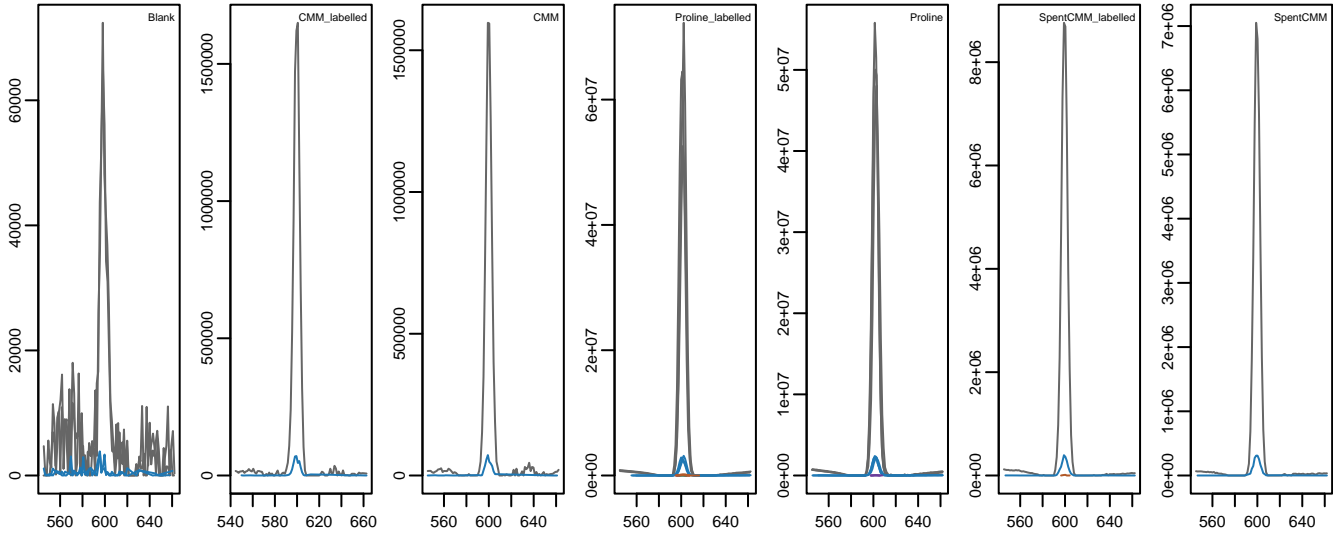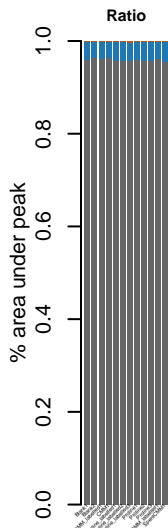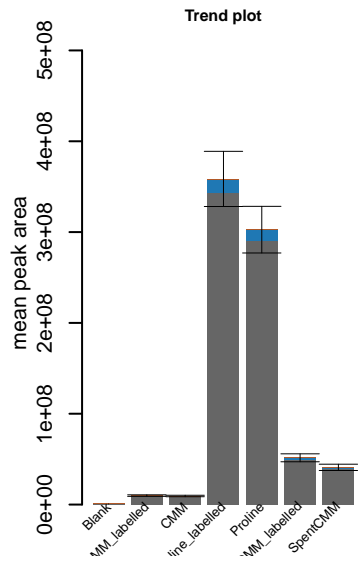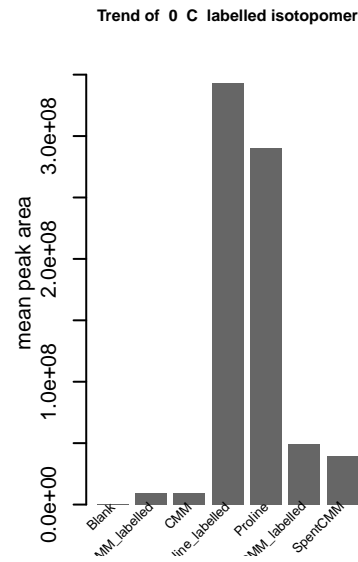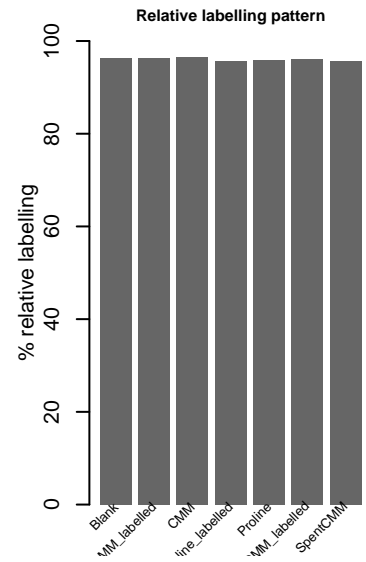

# Trypanothione disulfide

Formula: C<sub>27</sub>H<sub>47</sub>N<sub>9</sub>O<sub>10</sub>S<sub>2</sub> Mass: 721.289 Std.RT: NA Ion: NEG

# G1

■UL ■+1 ■+2 ■+3 ■+4 ■+5 ■+6 ■+7 ■+8 ■+9 ■+10 ■+11 ■+12 ■+13 ■

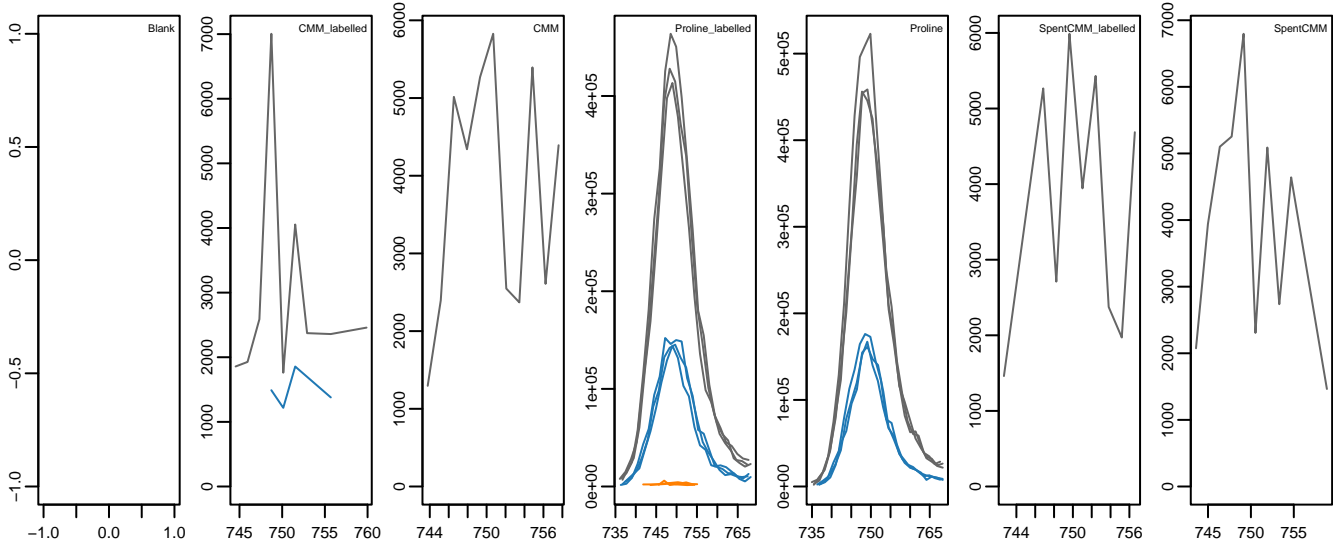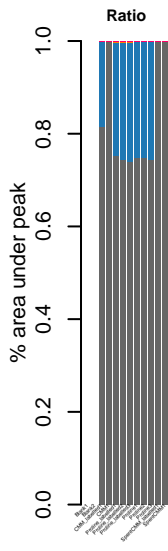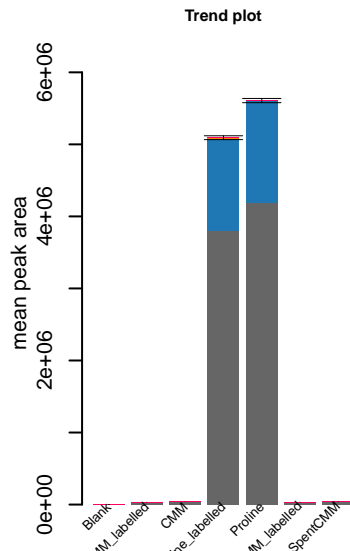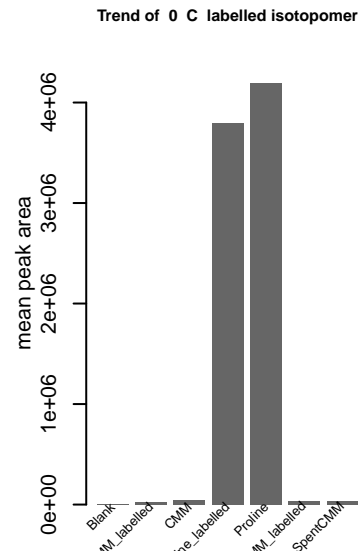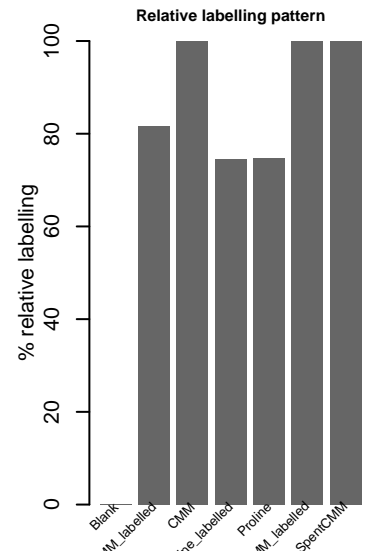

Supplement: bsr20181601_Supp1.pdf [file bsr20181601_Supp1.pdf]
